# Supplementary material for: Root-TRAPR: a modular plant growth device to visualize root development and monitor growth parameters, as applied to an elicitor response of Cannabis sativa
Source: Plant Methods. 2022 Apr 9;18:46. doi: 10.1186/s13007-022-00875-1 (PMC8994333; doi:10.1186/s13007-022-00875-1)
Supplement: Supplementary file 7 — Additional file 7: Gene and primer details of six C. sativa genes detected in this study. [file 13007_2022_875_MOESM7_ESM.xlsx]

## Sheet: Sheet1
No.	Gene name	Organism	Gene	Location	NCBI reference sequences			Forward primer					Reverse primer					PCR product size (kbp)
					mRNA	Protein		Sequence (5 --> 3)	Length (bp)	Tm (°C)	GC content (%)		Sequence (5 --> 3)	Length (bp)	Tm (°C)	GC content (%)
1	Actin	Cannabis sativa	LOC115704910	Chromosome 1	XM_030632129.1	XP_030487989.1		ACTACCGGTGAGTACCAAGT	20	57.7	50		TCAGCAATGCCTGGGAACAT	20	59.96	50		801
2	Ubiquitin	Cannabis sativa	LOC115705966	Chromosome 1	XM_030633466.1	XP_030489326.1		CAGGTGGAAAATGATTCTGTCGTG	24	60.38	45.83		ACGCACTCGAAGAATGTCTC	20	58.02	50		1004
3	Elongation factor 1-alpha	Cannabis sativa	LOC115722409	Chromosome 9	XM_030651612.1	XP_030507472.1		TCCGATAAAGGGACTCTCTCACA	23	60.31	47.83		CGTTGCCAATTTGACCAGGG	20	60.04	55		934
4	Chitinase 5	Cannabis sativa	LOC115698289	Chromosome 7	XM_030625503.1	XP_030481363.1		CTGGCTCAAAACTGTGGCTG	20	59.69	55		GCTCCCTGGAGAAACACCAA	20	59.89	55		834
5	Chitinase 2	Cannabis sativa	LOC115718799	Chromosome 2	XM_030647622.1	XP_030503482.1		CCAACCCTCCAATTTCACTTCC	22	59.44	50		CCCATCGCTAATAAAGCTGGTC	22	59.19	50		603
6	Chitinase 4-like	Cannabis sativa	LOC115707628	Chromosome 1	XM_030635645.1	XP_030491505.1		TGATTTTCCTGGTGGTGGCA	20	59.81	50		CCATCCTAGCAGGAGCCTTG	20	59.89	60		621
